1           **Title**

2   Phylogenomic analysis of *Clostridium perfringens* identifies isogenic strains in gastroenteritis  
3   outbreaks, and novel virulence-related features

4   **Running title:** Gastroenteritis-associated *Clostridium perfringens*

5

6           **Author information**

7   **Affiliations**

8   Raymond Kiu<sup>1,2</sup>, Shabhonam Caim<sup>1</sup>, Derek Pickard<sup>3</sup>, Anais Painset<sup>4</sup>, Craig Swift<sup>4</sup>, Gordon  
9   Dougan<sup>3</sup>, Alison E Mather<sup>5</sup>, Corinne Amar<sup>4</sup>, Lindsay J Hall<sup>1\*</sup>

10   <sup>1</sup> Gut Microbes & Health, Quadram Institute Bioscience, Norwich, United Kingdom

11   <sup>2</sup> Norwich Medical School, University of East Anglia, Norwich, United Kingdom

12   <sup>3</sup> Department of Medicine, University of Cambridge, Cambridge, United Kingdom

13   <sup>4</sup> Gastrointestinal Bacteria Reference Unit, Public Health England, London, United Kingdom

14   <sup>5</sup> Microbes in the Food Chain, Quadram Institute Bioscience, Norwich, United Kingdom

15

16

17   **Conflict of interest**

18   The authors declare no conflict of interest.

19

20   **\*Corresponding author**

21   Lindsay J Hall

22 Lindsay.Hall@quadram.ac.uk

23

24 **Abstract**

25 *Clostridium perfringens* is a major enteric pathogen known to cause gastroenteritis in human  
26 adults. Although major outbreak cases are frequently reported, limited Whole Genome  
27 Sequencing (WGS) based studies have been performed to understand the genomic  
28 epidemiology and virulence gene content of *C. perfringens*-associated outbreak strains. We  
29 performed both genomic and phylogenetic analysis on 109 *C. perfringens* strains (human and  
30 food) isolated from disease cases in England and Wales between 2011-2017. Initial findings  
31 highlighted the enhanced discriminatory power of WGS in profiling outbreak *C. perfringens*  
32 strains, when compared to the current Public Health England referencing laboratory  
33 technique of Fluorescent Amplified Fragment Length Polymorphism (fAFLP). Further  
34 analysis identified that isogenic *C. perfringens* strains were associated with nine distinct care  
35 home-associated outbreaks over the course of a 5-year interval, indicating a potential  
36 common source linked to these outbreaks or transmission over time and space. As expected  
37 the enterotoxin CPE gene was encoded in all but 4 isolates (96.4%; 105/109), with virulence  
38 plasmids encoding *cpe* (particularly pCPF5603- and pCPF4969-family plasmids) extensively  
39 distributed (82.6%;90/109). Genes encoding accessory virulence factors, such as beta-2 toxin,  
40 were commonly detected (46.7%; 50/109), and genes encoding phage proteins were also  
41 frequently identified, with additional analysis indicating their contribution to increased  
42 virulence determinants within the genomes of gastroenteritis-associated *C. perfringens*.  
43 Overall this large-scale genomic study of gastroenteritis-associated *C. perfringens* suggested  
44 that 3 major sub-types underlie these outbreaks: strains carrying (1) pCPF5603 plasmid, (2)  
45 pCPF4969 plasmid, and (3) strains carrying *cpe* on transposable element Tn5565 (usually

46 integrated into chromosome). Our findings indicate that further studies will be required to  
47 fully probe this enteric pathogen, particularly in relation to developing intervention and  
48 prevention strategies to reduce food poisoning disease burden in vulnerable patients, such as  
49 the elderly.

50

## 51 **Introduction**

52 *Clostridium perfringens* is an important pathogen known to cause disease in humans and  
53 animals (1, 2). Notably, the pathogenesis of *C. perfringens*-associated infections is largely  
54 attributed to the wide array of toxins this species can produce, with >20 toxins currently  
55 identified (3, 4). This Gram-positive spore former has been associated with foodborne and  
56 non-foodborne diarrhoeal diseases in humans, and preterm-necrotising enterocolitis (5, 6).  
57 *C. perfringens*-associated food poisoning, also termed acute watery diarrhoea, was first  
58 documented in the UK and USA in the 1940s (7). Typical symptoms occur within 8-14 h  
59 after ingestion of food contaminated with at least  $10^6$  CFU/g of live bacterial cells. These  
60 include intestinal cramp, watery diarrhoea without fever or vomiting, which normally  
61 resolves in 12-24 h (8). Importantly, *C. perfringens* is currently the second most common  
62 foodborne pathogen in the UK after *Campylobacter*, with cases often under reported due to  
63 the frequently self-limiting nature of the illness, with current estimates suggesting ~80,000  
64 cases/annum (9-12).

65 In the UK, antibiotic-associated diarrhoea and non-foodborne outbreaks of *C. perfringens*  
66 diarrhoea have been frequently reported since the 1980s amongst the elderly, particularly in  
67 hospital settings (13). With this type of illness, symptoms are more severe than foodborne  
68 diarrhoea and are longer lasting (>3 days to several weeks), often chronic, and infections are  
69 more likely to be spread amongst cases (14). This type of *C. perfringens* infection has also

70 been reported in elderly patients, especially those residing in care homes in the North East of  
71 England between 2012-2014 (83% of the outbreaks reported from care homes) (10).  
72 Although fatality due to *C. perfringens* diarrhoea is uncommon and hospitalisation rate is  
73 low, enterotoxigenic *C. perfringens* is reported to cause ~55 deaths/year in England and  
74 Wales according to the UK Food Standards Agency (15, 16).

75 The newly expanded and revised toxinotyping scheme classifies *C. perfringens* into 7  
76 toxinotypes (type A-G) according to the combination of typing toxins produced, with this  
77 classification used in this article (17). Human cases of *C. perfringens* diarrhoea are primarily  
78 caused by type F strains (formerly classified as enterotoxigenic type A), which produce  
79 enterotoxin (CPE), encoded by the *cpe* gene (18). This potent pore-forming toxin is reported  
80 to disrupt intestinal tight junction barriers, which is associated with intestinal disease  
81 symptoms (19). *C. perfringens*, and associated encoded toxins, have been extensively studied  
82 with respect to disease pathogenesis, with a strong focus on animal infections (20-24). Recent  
83 studies analysing a range of diverse *C. perfringens* strains (from both animal and human-  
84 associated infections) indicates a plastic and divergent pangenome, with a significant  
85 proportion of accessory genes predicted to be involved in virulence mechanisms and  
86 metabolisms, linked to enhanced host colonisation and disease initiation (3, 25). However,  
87 studies describing human outbreak-associated *C. perfringens* infections are limited, and to  
88 date only one recent study (58 isolates) has utilised Whole Genome Sequencing (WGS) data  
89 to probe the genomic epidemiology of associated strains (3, 26).

90 We have applied in-depth genomics and phylogenetic analyses to whole genome sequences  
91 of 109 newly-sequenced *C. perfringens* isolates associated with outbreaks or incidents of *C.*  
92 *perfringens* diarrhoea in England and Wales, either foodborne or non-foodborne-derived. We  
93 also identified distribution of known virulence-related determinants including toxin and  
94 antimicrobial resistance (AMR) genes, virulence-associated plasmid contents within food and

95 case isolates and probed putative functional capabilities of the accessory genomes and  
96 virulence features within encoded phage genomes. Importantly, we determined that isogenic  
97 strains were associated with 9 care-home outbreaks in North East England between 2013-  
98 2017, and furthermore uncovered the significant involvement of virulence plasmid-carrying  
99 *C. perfringens* in these outbreaks.

100

## 101 **Materials and methods**

### 102 **Bacterial isolates, PCR and genomic DNA extraction**

103 *C. perfringens* isolated from clinical cases of diarrhoea and suspected foods when available,  
104 were referred to the reference laboratory at PHE, Gastrointestinal Bacteria Reference Unit  
105 (GBRU). Identification and characterisation of cultures was performed by detection of the *C.*  
106 *perfringens* alpha toxin and enterotoxin gene by duplex real time PCR as described elsewhere  
107 (27). Enterotoxigenic *C. perfringens*, when associated with an outbreak or incident, were then  
108 further typed for strain discrimination using fluorescent amplified fragment length  
109 polymorphism (fAFLP) as previously described (28). In this study, 109 cultures  
110 characterised and archived by the GBRU between 2011 and 2017 were selected, representing  
111 enterotoxigenic and non-enterotoxigenic isolates from sporadic cases and outbreaks of *C.*  
112 *perfringens* food poisoning and of non-foodborne *C. perfringens* diarrhoea (**Table S1**).

113 DNA was extracted from overnight *C. perfringens* cultures (maximum of  $1 \times 10^7$  cells) lysed  
114 with lysis buffer (200µl Qiagen Buffer P1, 20 µl lysozyme with concentration at 100mg/ml)  
115 and incubated at 37°C for 1 h before addition of 20 µl Proteinase K (QIAasymphony DSP  
116 DNA kit), and incubation at 56°C for 5 h until cells had visibly lysed. Following incubation at  
117 96°C for 10 min, to inactivate proteases and any viable cells remaining, RNA was removed  
118 by adding 0.4 mg of RNase (Qiagen, Manchester) and incubation at 37°C for 15 min.

119 Genomic DNA was then purified using the QIASymphony DSP DNA kit on a QIASymphony  
120 SP automated DNA extraction platform (Qiagen, Manchester) according to manufacturer  
121 instructions.

## 122 **Computing infrastructure**

123 Computational analyses were performed on Norwich Biosciences Institute's (NBI) High  
124 Performing Computing cluster running Linux CentOS v7. Open-source software was utilised  
125 for genomic analysis.

## 126 **Genomic DNA sequencing**

127 Pure bacterial DNA was subjected to standard Illumina library preparation protocol prior to  
128 sequencing on in-house Illumina MiSeq (PH091-PH156) or HiSeq 2500 platforms (PH004-  
129 PH090; at Wellcome Trust Sanger Institute, UK) with read length (paired-end reads) 2 x 101  
130 bp and 2 x 151 bp respectively.

## 131 **Genome assembly and annotation**

132 Sequencing reads were assembled using SPAdes v3.11 (PH091-PH156) to generate draft  
133 genomes, the remaining assemblies were generated at Wellcome Trust Sanger Institute  
134 (Hinxton, UK) as described previously (for assembly quality see **Table S2**)(29, 30).  
135 Assemblies were improved by scaffolding/gap filling using SSPACE v3.0 and GapFiller  
136 v1.10 (31-33). Sequencing reads and coverage counts were calculated via in-house custom  
137 script using FASTQ reads and FASTA assemblies. Genome assemblies were annotated by  
138 Prokka v1.13 using in-house Genus-specific database that included 35 *Clostridium* species  
139 retrieved from NCBI RefSeq database to construct genus-specific annotation database (**Table**  
140 **S3**)(34). Sequences from very small contigs (contig size <200 bp) were removed prior to  
141 coding region prediction. Assembly statistics were extracted from Prokka outputs using an in-  
142 house script. Draft genomes were checked for sequence contamination using Kraken v1.1

143 (based on MiniKraken database) (35). All draft genomes containing >5% of contaminated  
144 species sequences (other than *C. perfringens*), whole genome Average Nucleotide Identity  
145 (ANI) < 95% (compared with reference genome NCTC8239; performed with Python module  
146 pyani v0.2.4), and assemblies with >500 contigs (considered as poor assemblies) were all  
147 excluded from further study (n=21)(36).

#### 148 **Reference genome**

149 A newly sequenced historical foodborne isolate genome NCTC8239 under the NCTC3000  
150 project<sup>1</sup> was retrieved (accession: SAMEA4063013) and assembled in this study with Canu  
151 pipeline v1.6 using PacBio reads (37). The final high-quality assembled genome consists of 3  
152 008 497 bp in 2 contigs (contig 1 has 2 940 812 bp, contig 2 has 67 685 bp).

#### 153 **Pangenome and phylogenetic analyses**

154 Pangenome of isolates was constructed using Roary v3.8.0 at BLASTp 90% identity, adding  
155 option -s (do not split paralogs), and options -e and -n to generate core gene alignment using  
156 MAFFT v7.3 (38, 39). Roary took GFF3-format annotated assemblies generated by Prokka.  
157 The pangenome includes both the core and accessory genomes; core genome is defined as  
158 genes present in at least 99% of the genomes, accessory genome as genes present in <99% of  
159 the genomes. SNP-sites v2.3.3 was used to extract single nucleotide variants from the core  
160 gene alignment for re-constructing a phylogenetic tree (40). Phylogenetic trees were  
161 generated using FastTree v2.1.9 and annotated using iTOL v4.2 (41, 42). FastTree was run  
162 using the Generalized Time-Reversible (GTR) model of nucleotide evolution on 1000  
163 bootstrap replicates to generate maximum-likelihood trees (41). SNP distance between  
164 genomes were computed using snp-dists (43). Population structure was analysed via the  
165 Bayesian-based clustering algorithm hierBAPS to assign lineages, implemented in R using

---

<sup>1</sup> <https://www.sanger.ac.uk/resources/downloads/bacteria/nctc/>

166 *rhierbaps* v1.0.1 (44, 45). The pangenome was visualised in Phandango while plots were  
167 generated using the associated R scripts in the Roary package (46).

### 168 **Profiling virulence and plasmid-related sequences**

169 Screening of toxin and AMR gene profiles, IS elements and plasmid *tcp* loci were performed  
170 via ABRicate with 90% identity and 90% coverage minimum cutoffs to infer identical genes  
171 based on a custom toxin database and the CARD database v2.0.0 (AMR) as described  
172 previously (47, 48). ARIBA v2.8.1 was used as a secondary approach to confirm detections  
173 of both toxin and AMR genes in raw sequence FASTQ files (49). Heat maps were generated  
174 in R using *gplots* and function *heatmap.2* (50, 51).

### 175 ***In silico* plasmid analysis**

176 Sequencing reads were utilised for computational plasmid prediction via software  
177 PlasmidSeeker v1.0 (52). Plasmid prediction was based on 8 514 plasmid sequences available  
178 in NCBI Reference Sequence databases (RefSeq; including 35 *C. perfringens* plasmids, see  
179 **Table S4**). All reads were searched for matching k-mers at k-mer length of 20 and screening  
180 cutoff at P-value 0.05 based on FASTQ reads. The top predicted plasmids appearing in each  
181 ‘cluster’ (with highest k-mer identity; k-mer percentage  $\geq 80\%$  as the minimum cutoff) were  
182 extracted as predicted plasmids (**Table S5**). Binary heat maps were generated as described in  
183 the previous section. Plasmid sequences from high-sequencing-coverage assemblies ( $>200\times$ ;  
184 single contig;  $n=12$ ) were extracted using in-house Perl scripts, identified by plasmid gene  
185 content. Plasmid annotation was performed via Prokka v1.13 using *Clostridium* genus-  
186 specific database as described in the previous section. Plasmid comparison and visualisation  
187 were performed using Easyfig v2.2.2.



188 **Bacterial genome-wide association analysis**

189 To associate subsets of genes with specific outbreaks or isolates, we used Scoary v1.6 to  
190 identify statistically-related genes based on Roary output (53). Cutoffs were set as  $\geq 80\%$   
191 sensitivity and 100% specificity. Specifically, for a Care Home (CH) and Food Poisoning  
192 (FP) subset comparison, sensitivity cutoff was set at  $\geq 50\%$  and specificity at 100%.

193 **Pangenome-wide functional annotation**

194 Functional categories (COG category) were assigned to genes for biological interpretation via  
195 eggNOG-mapper v0.99.3 based on the EggNog database (bacteria) (54, 55). Genes of interest  
196 were extracted via in-house Perl scripts from Roary-generated pangenome references.  
197 Annotations and COG categories were parsed with in-house scripts. Bar plots were generated  
198 using GraphPad Prism v6.

199 **Prophage mining**

200 Web tool PHASTER was utilised for detection of intact prophage existing in bacterial  
201 genomes (**Table S6**). Annotated GenBank files were submitted manually to the PHASTER  
202 web server and annotated data parsed with in-house scripts. The detection of phage was based  
203 on the scoring method and classification as described previously (56). Only intact phage  
204 regions within the genomes of completeness score  $> 100$  (of maximum 150) were analysed  
205 further (extracted by default using PHASTER web tool), annotated and colour-coded using  
206 Prokka v1.13 and Artemis for visualisation in EasyFig v2.2.2 and R package *gplots* function  
207 *heatmap.2* (57, 58). Bar plots were generated using GraphPad Prism v6.

208 **Nucleotide sequence accession numbers**

209 Sequence data in this study will be submitted to the European Nucleotide Archive (ENA) and  
210 made available under accession PRJEB25764 upon acceptance of manuscript.

211

## 212           **Results**

### 213   **Whole-genome based phylogenetic analysis reveals potential epidemiological clusters**

214   Initially we analysed the population structure of all strains sequenced. We defined general  
215   food poisoning isolates as Food Poisoning (FP, n =74), and care home specific isolates as  
216   Care Home (CH, n =35) (**Fig. 1A-B**). Quality of the genomic assemblies of draft genomes  
217   was also determined (**Fig. 1C; Table S2**), with >70% of the isolate assemblies <200 contigs.  
218   Separate analysis of CH isolates indicated four distinct phylogenetic lineages relating to care  
219   home outbreaks (**Fig. 2A**). Lineage I contained the reference genome NCTC8239, a historical  
220   *cpe*-positive isolate (originally isolated from salt beef) associated with a FP outbreak, and  
221   three newly sequenced strains (7). The remaining isolates clustered within three lineages (i.e.  
222   II, III and IV), that were divergent from lineage I indicating these CH isolates might be  
223   genetically distinct from typical FP isolates as in **Fig. 1A**. Further analysis indicated that 18  
224   closely-related strains obtained from 9 different outbreaks between 2013-2017 which  
225   occurred in the North East England, clustered within the same IVc sub-lineage (**Fig. 2B**).  
226   SNP investigation on these IVc isolates determined within-sub-lineage pairwise genetic  
227   distances of <80 SNPs ( $29.9 \pm 16.6$  SNPs; mean  $\pm$  S.D.; **Table S7**), suggesting a close  
228   epidemiological link. Isolates associated with specific outbreaks within sub-lineage IVc (i.e.  
229   outbreaks 2, 7, 8, 9 and 10) showed very narrow pairwise genetic distances <20 SNPs ( $6.6 \pm$   
230   6.6 SNPs; mean  $\pm$  S.D.; **Fig. 2C**), suggesting potential involvement of an isogenic strain  
231   (genetically highly similar) within these individual care home outbreaks (although a number  
232   of genetically dissimilar strains were also isolated from outbreaks 1, 2, 3, 6, 7 and 8 as shown  
233   in **Fig. 2A**).

234   This WGS analysis was also shown to have greater discriminatory power than the currently  
235   used fAFLP. The fAFLP typing (type CLP 63, yellow-coded) failed to discriminate isolates

236 from 6 different outbreaks (CH outbreaks 2-7; **Fig. 2A**), while SNP analysis clearly  
237 distinguished these strains (**Fig. 2B**) (59).

238 Analysis of FP isolates indicated clear separation between lineages (**Fig. 3A**), particularly  
239 between lineage I, and remaining lineages II-VII (pairwise mean SNP distance lineage I vs  
240 lineages II-VII:  $35165 \pm 492$  SNPs; within lineage I:  $5684 \pm 2498$  SNPs; within lineages II-  
241 VII:  $13542 \pm 8675$  SNPs). Isolates from three individual foodborne-outbreaks within lineage  
242 VII appear to be highly similar even though these isolates demonstrated geographical  
243 heterogeneity (**Fig. 3A**), and further analysis indicated two different outbreaks that occurred  
244 in London (2013) were related, but somewhat distinct from isolates obtained in North East  
245 England (2015) outbreaks (**Fig. 3B**). This suggests a geographical separation of a common  
246 ancestor at an earlier time point and may also indicate the potential widespread distribution of  
247 a genetically-related strain.

248 Isolates from individual FP outbreaks also appeared to be clonal and isogenic, as pairwise  
249 genetic distances were between 0-21 SNPs (mean genetic distance:  $2.6 \pm 2.7$  SNPs; **Fig. 3C**  
250 **and Table S8**), when compared to same-lineage-between-outbreaks SNP distances of  $>1200$   
251 SNPs (**Fig. 3D**). In addition, outbreak-associated food source isolates were not  
252 distinguishable from human clinical isolates (genetically similar, pair-wise SNP range: 0-16  
253 SNPs) in 7 individual FP outbreaks (**Fig. 3A**). These findings are consistent with the  
254 hypothesis that contaminated food is the main source of these *C. perfringens* food poisoning  
255 outbreaks, which included all meat-based food stuffs e.g. cooked sliced beef, lamb, chicken  
256 curry, cooked turkey and cooked meat (**Table S1**).

### 257 **Virulence gene content**

258 Diarrhoea symptoms associated with *C. perfringens* are primarily due to production of the  
259 pore-forming toxin enterotoxin (CPE) by *C. perfringens* type F strains (2, 60). Additional

260 virulence determinants implicated in diarrhoea include sialidase (NanI), which is linked to  
261 enhanced intestinal attachment and an accessory role in enhancing CPE cell-toxicity, and also  
262 pore-forming toxin perfringolysin (PFO), a toxin known to act synergistically with alpha-  
263 toxin (phospholipase produced by all *C. perfringens* strains) to inflict intestinal cell damage  
264 (24, 61, 62). Moreover, antibiotic-resistant *C. perfringens* are reported to be prevalent,  
265 particularly within poultry, thus antimicrobial resistance (AMR) profiles of *C. perfringens*  
266 may be linked with prolonged *C. perfringens* associated-infections, and may hamper  
267 downstream treatments strategies (63, 64). To probe these important virulence-associated  
268 traits we screened isolates for toxin and AMR genes, based on both genome assemblies and  
269 raw sequence reads.

270 Enterotoxin gene *cpe* was detected in all, but 4 isolates (PH017, PH029, PH045 and PH156  
271 were *cpe*-negative), which was confirmed by PCR, with the exception of PH029 which was  
272 initially determined to be *cpe*-positive via PCR (96.4%; **Table S1; Fig. S1B**).

273 CH isolates (average  $9.6 \pm 1.0$  toxin genes per isolate) encoded significantly more toxin  
274 genes ( $P < 0.001$ ) than FP isolates ( $7.3 \pm 1.9$  toxin genes per isolate; **Fig. S1A**). CH isolates in  
275 lineages II-IV generally possessed identical toxin profiles (**Fig. 4A**); colonisation-related  
276 sialidase-encoding genes *nanI*, *nanJ* and *nagH*, haemolysin PFO gene *pfo*, and *cpb2* (**Fig.**  
277 **S1C-G**), which produces a vital accessory toxin beta-2 toxin (CPB2) associated with CPE-  
278 mediated pathogenesis (65). However, CH isolates did not harbour many acquired AMR  
279 genes; only 6 isolates (out of 35; 17%) encoded tetracycline resistant genes *tet(P)*, one isolate  
280 encoded aminoglycoside resistant gene *APH(3')*, with remaining isolates not encoding any  
281 acquired AMR genes, other than the intrinsic AMR gene *mprF*.

282 FP isolates had a more variable virulence gene profile (**Fig. 4B**). Isolates in lineage I had  
283 identical toxin genes, including *cpe*, but these isolates did not encode toxins such as PFO,

284 CPB2 and sialidase NanI, and only three isolates in this lineage carried tetracycline resistant  
285 genes (19%). Most isolates within lineages II-VII (92%; 53/58) encoded *tetA(P)*, with this  
286 AMR gene significantly enriched in all FP isolates (74.3%; 55/74;  $P < 0.0001$ ; **Fig. S1H**),  
287 when compared to CH isolates (17.1%; 6/35). Furthermore, most isolates in FP lineages II-  
288 VII also encoded toxin genes *cpe*, *nanI* and *pfo*, and 16 isolates (28%) possessed the  
289 accessory toxin gene *cpb2*. Statistically these FP isolates ( $8.0 \pm 1.5$  toxin genes) encoded  
290 more toxin genes than those belonging to FP lineage I ( $4.9 \pm 0.3$  toxin genes;  $P < 0.0001$ ; **Fig.**  
291 **S1I**) which may suggest increased virulence. Initial plasmid detection indicated that virulence  
292 plasmid pCPF5603 was associated with CH isolates (97% in CH plasmid-carrying isolates;  
293 34/35;  $P < 0.0001$ ), while plasmid pCPF4969 was linked to FP isolates (86.4% in FP plasmid-  
294 carrying isolates; 51/59;  $P < 0.0001$ ; **Fig. S1J**).

### 295 **Specific plasmid-associated lineages and potential CPE-plasmid transmission**

296 The CPE toxin is responsible for the symptoms of diarrhoea in food poisoning, and non-  
297 foodborne illnesses, in the latter usually lasting  $>3$  days, and up to several weeks (2, 66).  
298 Genetically, whilst chromosomal encoded *cpe* strains are primarily linked to food-poisoning  
299 (67, 68), non-foodborne diarrhoea is usually associated with plasmid-borne *cpe* strains (66,  
300 69, 70). We performed an in-depth plasmid prediction on our datasets and analysis indicated  
301 that CH isolates predominantly harboured pCPF5603 plasmids (34/35 isolates; 97%)  
302 encoding *cpb2* and *cpe* genes, whilst FP isolates carried primarily pCPF4969 plasmids (45/75  
303 isolates; 60%) encoding *cpe* but not *cpb2* genes (**Fig. S1J**). We also performed a genome-  
304 wide plasmid-specific sequence search to confirm our findings including *IS1151*  
305 (pCPF5603), *IS1470*-like (pCPF4969) and plasmid conjugative system *tcp* genes (**Fig. 4A-B**)  
306 (71-73).

307 To further examine and confirm the predicted plasmids, we extracted plasmid sequences  
308 (complete unassembled single contig) from three isolates per CH or FP group, and compared

309 with reference plasmids (**Fig. 5A-C**). The extracted plasmid sequences closely resembled the  
310 respective reference plasmids, with near-identical nucleotide identity (>99.0%), plasmid size  
311 and GC content (**Fig. 5B-C; Table S9**), thus supporting the findings that these two intact  
312 plasmids (pCPF4969 and pCPF5603) are present in these isolates.

313 Although chromosomal-*cpe* strains are considered as the primary strain type to be associated  
314 with food poisoning, our dataset demonstrated that plasmid-*cpe* *C. perfringens* strains were  
315 predominantly associated with food poisoning (82.6%; 90/109), with only 17.4% FP isolates  
316 encoding a copy of *cpe* on the chromosome (no plasmid detected). Putatively, plasmid  
317 transfer may have occurred in CH outbreak 7 isolates (n=4; PH030, PH031, PH032, PH033),  
318 as two isolates reside within lineage IV, whilst the other two isolates nest within the  
319 genetically distant CH lineage I (genetic distance >10 000 SNPs), however all 4 isolates  
320 harboured plasmid pCPF5603 (**Fig. 4A**). CH outbreaks 1 and 8 also had dissimilar strains  
321 (nested within separate lineages) with identical plasmids. This analysis denotes that multiple  
322 distinct strains, but carrying the same *cpe*-plasmid, may be implicated in these CH outbreaks,  
323 with previous work showing *in vitro* plasmid transfer among *C. perfringens* strains via  
324 conjugation (*cpe*-positive to *cpe*-negative strains) (74).

325 Previous studies have demonstrated that *C. perfringens* with chromosomally-encoded *cpe* are  
326 genetically divergent from plasmid-*cpe* carriers. Within the FP phylogeny there was a distinct  
327 lineage of isolates (lineage I; n=17) that appear to encode *cpe* chromosomally. These isolates  
328 had significantly smaller genomes (genome size  $2.95 \pm 0.03$  Mb vs  $3.39 \pm 0.08$  Mb outside-  
329 lineage; n=93;  $P < 0.0001$ ; **Table S10**), were most similar to reference genome NCTC8239  
330 (ANI $\geq$ 99.40%) and appeared to lack plasmids. This was further evidenced by historical  
331 chromosomal-*cpe* strain NCTC8239 nesting in this lineage with these newly sequenced  
332 strains (FP lineage I; **Fig. 4**) (70, 72, 75). To further investigate this hypothesis, the *cpe*-  
333 encoding region (complete single contig from high-coverage assemblies) was extracted from

334 representative isolates in lineage I (n=6), and comparative genomics was performed (**Fig.**  
335 **5D**). These consistently smaller (~4.0-4.3 kb) contigs were almost identical in nucleotide  
336 identity (>99.9%) when compared with the *cpe*-encoding region of chromosomal-*cpe* strain  
337 NCTC8239, confirming that these isolates possessed the same *cpe* genomic architecture as  
338 NCTC8239 and confirmed as transposable element Tn5565 (**Fig. 5E**). In addition, PH029  
339 was the only outbreak isolate not detected to encode *cpe* within the lineage I outbreak cluster,  
340 despite having a clonal relationship with PH028, PH104, PH105 and PH107 (FP outbreak 4;  
341 **Fig. 4B**). This suggests Tn5565 loss may have occurred due to extensive sub-culturing (this is  
342 supported by initial PCR results being *cpe*-positive; see **Table S1**). Analysis also indicates  
343 that *cpe* was closely associated with *IS1469* independent of where it was encoded, as this  
344 insertion sequence was detected exclusively in all *cpe*-encoding genomes (100%; **Fig. 4A-B**).

#### 345 **Accessory genome virulence potentials**

346 The 110 strain *C. perfringens* pangenome consisted of 6 219 genes (including NCTC8239;  
347 **Fig. S2**); 1 965 core genes (31.5%), and 4 254 accessory genes (68.5%); with ~30-40% genes  
348 in any individual strain encoded within the accessory genome, potentially driving evolution  
349 and genome restructuring. Mobile genetic elements including plasmids, genomic islands and  
350 prophages could potentially contribute to virulence, given the plasticity of the genome. To  
351 explore this in more detail, we further analysed the accessory genomes, comparing different  
352 sub-sets of *C. perfringens* isolates. We first identified subset-specific genes using a bacterial  
353 pan-GWAS approach, with these genes further annotated based on NCBI RefSeq gene  
354 annotations and categorised under COG classes into three comparison groups: (1) CH vs FP;  
355 (2) FP outbreaks; (3) FP lineage I, FP lineage II-VII and CH-FP plasmid-CPE isolates (**Fig.**  
356 **S3A-C**).

357 Phosphotransferase system (PTS)-related genes (n=4) were encoded exclusively in CH  
358 isolates (present in 26/35 CH isolates; **Fig. S3A and Table S11**). These genes may contribute

359 to the isolates' fitness to utilise complex carbohydrates (COG category G) in competitive  
360 niches, like the gastrointestinal tract (76). PTS genes have been linked to virulence regulation  
361 in other pathogens including foodborne pathogen *Listeria monocytogenes* (77). Heat-shock  
362 protein (Hsp70) DnaK co-chaperone was annotated in FP-specific accessory genome (present  
363 in 57/74 FP isolates), which may be involved in capsule and pili formation which may  
364 facilitate host colonisation (78-80).

365 Accessory genes specific to each FP outbreaks were variable (**Fig. S3B-C and Table S12**),  
366 but 3 annotated functional classes were conserved; L (replication, recombination & repair), M  
367 (cell wall/membrane/envelope biogenesis) and V (defense mechanisms). Prominent genes  
368 detected in all isolates included phage-related proteins (n=49) (L, M and S),  
369 glycosyltransferases (n=37) (M), restriction modification systems (n=16) (V), transposases  
370 (n=9) (L) and integrases (n=8) (L). It was evident that most genes were associated with  
371 phages, seemingly a major source of mobile genetic transfer.

372 Correspondingly, less group-specific accessory genes were present compared with other  
373 isolates in lineages II-VII (**Fig. S3C and Table S13**). Notably, multidrug transporter 'small  
374 multidrug resistance' genes were exclusively detected in FP lineage I isolates, whereas ABC  
375 transporters were more commonly encoded in plasmid-carrying isolates (virulence plasmids  
376 pCPF5603 and pCPF4969 carry various ABC transporter genes). The Mate efflux family  
377 protein gene was detected solely in lineage II-VII isolates.

### 378 **Prophage genomes linked to enhanced *C. perfringens* fitness**

379 Phage are important drivers of bacterial evolution and adaptation, and presence of prophage  
380 within bacterial genomes is often associated with enhanced survival and virulence e.g.  
381 sporulation capacity and toxin secretion (81-83). Thus, mining phages in foodborne *C.*  
382 *perfringens* genomes could reveal insights into the role of bacteriophage in modulating



383 diversity and pathogenesis traits (25). We identified through PHASTER a total of 7  
384 prophages in all 109 genomes (**Fig. S4A-B**). Further exploration into virulence and survival-  
385 enhancing genes (**Fig. S4C**) encoded in these predicted prophage regions revealed the  
386 presence of virulence-related enzyme sialidase NanH (promotes colonisation), putative  
387 enterotoxin EntB, various ABC transporters (linked to multidrug resistance) and toxin-linked  
388 phage lysis holin (probable link to toxin secretion)(61, 84-86). No differences in number of  
389 prophages carried were detected between CH and FP isolates (**Fig. S4D-E**). These data  
390 suggested that phages could potentially contribute to increased accessory virulence within the  
391 genomes of food-poisoning associated *C. perfringens*, and indicates further research, using  
392 both experimental and genomic approaches, is required.

393

## 394 **Discussion**

395 *C. perfringens* is often associated with self-limiting or longer-term gastroenteritis, however  
396 our knowledge on the genomic components that may link to disease symptoms or  
397 epidemiological comparisons between outbreaks is limited. In this study, WGS data and in-  
398 depth genomic analysis on a representative sub-set of 109 gastrointestinal outbreak-  
399 associated *C. perfringens* isolates, revealed potential epidemic phylogenetic clusters linked to  
400 plasmid carriage, and specific virulence determinants, which were strongly associated with  
401 outbreak isolates.

402 In the context of disease control it is important to gain detailed genomic information to  
403 predict transmission modes for pathogens. Our analysis of care home isolates indicated a  
404 specific persistent clone may have been responsible for up to 9 individual gastrointestinal  
405 outbreaks in North East England over the 2013-2017 period, which represents the majority  
406 reported gastroenteritis outbreaks (>80%) in this area (10). Interestingly, a previous study

407 indicated presence of persistent identical *C. perfringens* genotypes within care home settings,  
408 with several individuals harbouring identical strains (as determined via PFGE profiling)  
409 throughout a 9-month sampling period, however none of these isolates were positive for  
410 the *cpe* gene (87). Furthermore, although care home isolates were defined as ‘non-foodborne’  
411 according to local epidemiological investigations as no food samples were identified as *C.*  
412 *perfringens*-positive, these outbreaks may have resulted from contaminated food products not  
413 sampled. Indeed, a recent investigation into fresh meat products (>200 samples)  
414 demonstrated significant contamination; beef (~30%), poultry and pork (both ~26%), with  
415 90% of strains *cpe*-positive, suggesting food chain(s) or farmed animals as potential  
416 reservoirs of enterotoxigenic *C. perfringens* (70, 88). Interestingly, 18% prevalence of *cpe*-  
417 positive *C. perfringens* strains had previously been reported in food handlers’ faeces  
418 (confirmed via PCR), denoting a potential role of the human reservoir in outbreaks (89).  
419 Determination of these potential reservoirs in the spread of *cpe*-positive *C. perfringens* to at-  
420 risk populations would necessitate a One Health approach, and large-scale WGS-based  
421 screening to ascertain the phylogenomics of strains isolated from diverse sources surrounding  
422 outbreak-linked vicinities.

423 Successful colonisation of invading *C. perfringens* is required for efficient toxin production,  
424 which ultimately leads to gastrointestinal symptoms. Through computational analysis we  
425 determined that plasmid-*cpe* (specifically plasmids pCPF4969 and pCPF5603) carrying  
426 strains predominated within both non-foodborne and food-poisoning outbreak-related *C.*  
427 *perfringens* isolates (~82%). These two virulence plasmids, pCPF4969 and pCPF5603,  
428 encoded several important virulence genes including ABC transporter and adhesin (also  
429 known as collagen adhesion gene *cna*) that could contribute to enhanced survival and  
430 colonisation potential of *C. perfringens* within the gastrointestinal tract (90). Plasmid  
431 pCPF4969 also contained a putative bacteriocin gene that may allow *C. perfringens* to

432 outcompete other resident microbiota members, and thus overgrow and cause disease in the  
433 gut environment (73). Plasmid pCPF5603 encoded important toxin genes *cpe* and *cpb2*, plus  
434 additional toxins, many of which are linked to food poisoning symptoms, such as diarrhoea  
435 and cramping.

436 Interestingly, 4 out of 109 outbreak-associated strains were *cpe*-negative, suggesting  
437 secondary virulence genes (e.g. *pfo* and *cpb2*) may be associated with *C. perfringens*-  
438 associated gastroenteritis. A recent WGS-based study on FP *C. perfringens* outbreaks in  
439 France determined that ~30% of isolates were *cpe*-negative (13/42) (26), indicating this gene  
440 may not be the sole virulence determinant linked to *C. perfringens* gastroenteritis. Although  
441 we observed less *cpe*-negative strains in our collection in comparison to this study, this may  
442 be due to our targeted *cpe*-positive isolation strategy (standard practice at PHE). Thus, to  
443 determine the importance and diversity of *cpe*-negative strains in FP outbreaks this will  
444 require untargeted isolation schemes in the future.

445 Typical *C. perfringens*-associated food poisoning was previously thought to be primarily  
446 caused by chromosomal-*cpe* strains. This is linked to their phenotypic capacity to withstand  
447 high temperatures (via production of a protective small acid soluble protein), and high salt  
448 concentrations during the cooking process, in addition to the shorter generation time, when  
449 compared to plasmid-*cpe* carrying strains (68, 91). Previous studies have indicated that these  
450 strains commonly assemble into distinct clusters that lack the *pfo* gene, which we also noted  
451 in the FP lineage I data from this study (26, 92-94). Nevertheless, plasmid-borne *cpe*-carrying  
452 strains (pCPF4969 or pCPF5603) have also been associated with previous food poisoning  
453 outbreaks, with a previous study indicating that pCPF5603-carrying strains (encoding  
454 IS1151) were associated with food poisoning in Japanese nursing homes (7 out of 9 isolates)  
455 (71). However, these plasmid-*cpe* outbreaks have been described as a relatively uncommon  
456 occurrence, thus it is surprising that our findings indicate that most outbreak isolated strains

457 (81.6%; 89/109) carried a *cpe*-plasmid (60, 67). The fact that plasmid-*cpe* strains can cause  
458 diverse symptoms including short-lived food poisoning, and long-lasting non-foodborne  
459 diarrhoea, implicates additional factors in disease pathogenesis. The gut microbiome may be  
460 one such host factor as previous studies have reported that care home residents have a less  
461 diverse and robust microbiota when compared to those residing in their own homes  
462 (including individuals colonised with *C. perfringens*), and thus impaired ‘colonisation  
463 resistance’ may mean certain *C. perfringens* strains can overcome these anti-infection  
464 mechanisms and initiate disease pathogenesis (64, 87, 95).

465 Chromosomal-*cpe* is reported to be encoded on a transposon-like element Tn5565 (6.3 kb,  
466 with flanking copies of IS1470), which can form an independent and stable circular-form in  
467 culture extracts (losing both copies of IS1470) (72, 74). This transposition element TN5565  
468 was commonly thought to be integrated into the chromosome at a specific site as a unit. The  
469 fact that our computational analysis failed to detect any *cpe*, IS1469 (*cpe*-specific), and  
470 IS1470 (Tn5565-specific) in the high-sequencing-coverage PH029 genome (317X  
471 sequencing depth/coverage) indicates that Tn5565 can be lost or may be passed on to other *C.*  
472 *perfringens* cells. However, it should be noted that flanking IS1470 of Tn5565 may not have  
473 been correctly assembled during the genome assembly process due to the repetitive nature of  
474 those sequences (short-read sequencing).

475 As WGS provides enhanced resolution to identify outbreak-specific clonal strains, our study  
476 highlighted the importance of implementing WGS for *C. perfringens* profiling in reference  
477 laboratories, in place of the conventional fAFLP (92, 93, 96). Routine *C. perfringens*  
478 surveillance of the care home environment and staff could prove critical for vulnerable  
479 populations, as outbreaks could rapidly spread, and this approach could potentially pinpoint  
480 the sources of contamination, and eventually eliminate persistent *cpe*-strains in the  
481 environment (87). In light of the potential rapid transmissibility of *C. perfringens cpe*-strains

482 responsible for food-poisoning outbreaks, real-time portable sequencing approaches such as  
483 the MinION, could facilitate the rapid identification of outbreak strains, which has been  
484 recently been reported to identify outbreak *Salmonella* strains in <2h (97, 98).

485 Our data highlights the genotypic and epidemiology relatedness of a large collection of *C.*  
486 *perfringens* strains isolated from food poisoning cases from across England and Wales, and  
487 indicates potential circulation of disease-associated strains, and the potential impact of  
488 plasmid-associated-*cpe* dissemination, linked to outbreak cases. This study indicates that  
489 further WGS phylogenetic and surveillance studies of diversely-sourced *C. perfringens*  
490 isolates are required for us to fully understand the potential reservoir of food poisoning-  
491 associated strains, so that intervention or prevention measures can be devised to prevent the  
492 spread of epidemiologically important genotypes, particularly in vulnerable communities,  
493 including older adults residing in care homes.

494

#### 495 **Electronic supplemental materials**

496 Supplementary Figure S1

497 Supplementary Figure S2

498 Supplementary Figure S3

499 Supplementary Figure S4

500 Supplementary Table S1

501 Supplementary Table S2

502 Supplementary Table S3

503 Supplementary Table S4

504 Supplementary Table S5

505 Supplementary Table S6

506 Supplementary Table S7

507 Supplementary Table S8

508 Supplementary Table S9

509 Supplementary Table S10

510 Supplementary Table S11

511 Supplementary Table S12

512 Supplementary Table S13

### 513 **Acknowledgments**

514 This work was supported by a Wellcome Trust Investigator Award (100974/C/13/Z), and the  
515 Biotechnology and Biological Sciences Research Council (BBSRC); Institute Strategic  
516 Programme Gut Microbes and Health BB/R012490/1, and its constituent project(s)  
517 BBS/E/F/000PR10353 and BBS/E/F/000PR10356, and Institute Strategic Programme Gut  
518 Health and Food Safety BB/J004529/1 to LJH, and Institute Strategic Programme Microbes  
519 in the Food Chain BB/R012504/1 to AEM. This research was supported in part by the NBI  
520 Computing infrastructure for Science (CiS) group through the provision of a High-  
521 Performance Computing (HPC) Cluster. We also thank Dr. Andrew Page (Quadram Institute,  
522 UK) for the helpful discussion on computational analysis.

523 R.K., C.A. and L.J.H. designed the study. R.K. and A.P. processed the sequencing data. R.K.  
524 performed the genomic analysis and graphed the figures. S.C. and A. P. provided essential  
525 assistance in genome assembly and genomic analysis. A.M. contributed in genomic analysis

526 tools and edited the manuscript, R.K., C.A. and L.J.H. analysed the data and co-wrote the  
527 manuscript. CS and CA managed the culture collection, genotyping, clinical data collection,  
528 and processed samples for sequencing.

529

## 530 **References**

- 531 1. Awad MM, Ellemor DM, Boyd RL, Emmins JJ, Rood JI. Synergistic effects of alpha-  
532 toxin and perfringolysin O in *Clostridium perfringens*-mediated gas gangrene. *Infect Immun*.  
533 2001;69:7904-10.
- 534 2. Kiu R, Hall LJ. An update on the human and animal enteric pathogen *Clostridium*  
535 *perfringens*. *Emerging Microbes & Infections*. 2018;7(1):141.
- 536 3. Kiu R, Caim S, Alexander S, Pachori P, Hall LJ. Probing Genomic Aspects of the  
537 Multi-Host Pathogen *Clostridium perfringens* Reveals Significant Pangenome Diversity, and  
538 a Diverse Array of Virulence Factors. *Front Microbiol*. 2017;8:2485.
- 539 4. Revitt-Mills SA, Rood JI, Adams V. *Clostridium perfringens* extracellular toxins and  
540 enzymes: 20 and counting. *Microbiology Australia*. 2015:114-7.
- 541 5. Kim YJ, Kim SH, Ahn J, Cho S, Kim D, Kim K, et al. Prevalence of *Clostridium*  
542 *perfringens* toxin in patients suspected of having antibiotic-associated diarrhea. *Anaerobe*.  
543 2017;48:34-6.
- 544 6. Sim K, Shaw AG, Randell P, Cox MJ, McClure ZE, Li MS, et al. Dysbiosis  
545 anticipating necrotizing enterocolitis in very premature infants. *Clin Infect Dis*.  
546 2015;60(3):389-97.
- 547 7. Hobbs BC, Smith ME, Oakley CL, Warrack GH, Cruickshank JC. *Clostridium*  
548 *welchii* food poisoning. *J Hyg (Lond)*. 1953;51(1):75-101.
- 549 8. DuPont HL. Clinical practice. Bacterial diarrhea. *N Engl J Med*. 2009;361(16):1560-9.
- 550 9. O'Brien SJ, Larose TL, Adak GK, Evans MR, Tam CC, Foodborne Disease  
551 Attribution Study G. Modelling study to estimate the health burden of foodborne diseases:  
552 cases, general practice consultations and hospitalisations in the UK, 2009. *BMJ Open*.  
553 2016;6(9):e011119.
- 554 10. Dolan GP, Foster K, Lawler J, Amar C, Swift C, Aird H, et al. An epidemiological  
555 review of gastrointestinal outbreaks associated with *Clostridium perfringens*, North East of  
556 England, 2012-2014. *Epidemiol Infect*. 2016;144(7):1386-93.
- 557 11. Adak GK, Long SM, O'Brien SJ. Trends in indigenous foodborne disease and deaths,  
558 England and Wales: 1992 to 2000. *Gut*. 2002;51(6):832-41.
- 559 12. Tam CC, Rodrigues LC, Viviani L, Dodds JP, Evans MR, Hunter PR, et al.  
560 Longitudinal study of infectious intestinal disease in the UK (IID2 study): incidence in the  
561 community and presenting to general practice. *Gut*. 2012;61(1):69-77.
- 562 13. Borriello SP, Larson HE, Welch AR, Barclay F, Stringer MF, Bartholomew BA.  
563 Enterotoxigenic *Clostridium perfringens*: a possible cause of antibiotic-associated diarrhoea.  
564 *Lancet*. 1984;1(8372):305-7.
- 565 14. Larson HE, Borriello SP. Infectious diarrhea due to *Clostridium perfringens*. *J Infect*  
566 *Dis*. 1988;157(2):390-1.
- 567 15. Food Standards Agency. Foodborne Disease Strategy 2010-2015. 2011 May 2011.

- 568 16. Food Standards Agency. Report of the study of infectious intestinal disease in  
569 England. *Commun Dis Rep CDR Wkly*. 2000;10(51):457.
- 570 17. Rood JI, Adams V, Lacey J, Lyras D, McClane BA, Melville SB, et al. Expansion of  
571 the *Clostridium perfringens* toxin-based typing scheme. *Anaerobe*. 2018.
- 572 18. Fernandez Miyakawa ME, Pistone Creydt V, Uzal FA, McClane BA, Ibarra C.  
573 *Clostridium perfringens* enterotoxin damages the human intestine in vitro. *Infect Immun*.  
574 2005;73(12):8407-10.
- 575 19. Shinoda T, Shinya N, Ito K, Ohsawa N, Terada T, Hirata K, et al. Structural basis for  
576 disruption of claudin assembly in tight junctions by an enterotoxin. *Sci Rep*. 2016;6:33632.
- 577 20. Ronco T, Stegger M, Ng KL, Lilje B, Lyhs U, Andersen PS, et al. Genome analysis of  
578 *Clostridium perfringens* isolates from healthy and necrotic enteritis infected chickens and  
579 turkeys. *BMC Res Notes*. 2017;10(1):270.
- 580 21. Li C, Yan X, Lillehoj HS. Complete Genome Sequence of *Clostridium perfringens*  
581 LLY\_N11, a Necrotic Enteritis-Inducing Strain Isolated from a Healthy Chicken Intestine.  
582 *Genome Announc*. 2017;5(44).
- 583 22. Gaucher ML, Perron GG, Arsenault J, Letellier A, Boulianne M, Quessy S. Recurring  
584 Necrotic Enteritis Outbreaks in Commercial Broiler Chicken Flocks Strongly Influence Toxin  
585 Gene Carriage and Species Richness in the Resident *Clostridium perfringens* Population.  
586 *Front Microbiol*. 2017;8:881.
- 587 23. Park JY, Kim S, Oh JY, Kim HR, Jang I, Lee HS, et al. Characterization of  
588 *Clostridium perfringens* isolates obtained from 2010 to 2012 from chickens with necrotic  
589 enteritis in Korea. *Poultry Science*. 2015;94(6):1158-64.
- 590 24. Verherstraeten S, Goossens E, Valgaeren B, Pardon B, Timbermont L, Vermeulen K,  
591 et al. The synergistic necrohemorrhagic action of *Clostridium perfringens* perfringolysin and  
592 alpha toxin in the bovine intestine and against bovine endothelial cells. *Vet Res*. 2013;44:45.
- 593 25. Lacey JA, Allnut TR, Vezina B, Van TTH, Stent T, Han X, et al. Whole genome  
594 analysis reveals the diversity and evolutionary relationships between necrotic enteritis-  
595 causing strains of *Clostridium perfringens*. *BMC Genomics*. 2018;19(1):379.
- 596 26. Mahamat Abdelrahim A, Radomski N, Delannoy S, Djellal S, Le Négrate M, Hadjab  
597 K, et al. Large-Scale Genomic Analyses and Toxinotyping of *Clostridium perfringens*  
598 Implicated in Foodborne Outbreaks in France. 2019;10(777).
- 599 27. Amar CF, East CL, Grant KA, Gray J, Iturriza-Gomara M, Maclure EA, et al.  
600 Detection of viral, bacterial, and parasitological RNA or DNA of nine intestinal pathogens in  
601 fecal samples archived as part of the english infectious intestinal disease study: assessment of  
602 the stability of target nucleic acid. *Diagn Mol Pathol*. 2005;14(2):90-6.
- 603 28. Roussel S, Felix B, Grant K, Dao TT, Brisabois A, Amar C. Fluorescence amplified  
604 fragment length polymorphism compared to pulsed field gel electrophoresis for *Listeria*  
605 *monocytogenes* subtyping. *BMC Microbiol*. 2013;13:14.
- 606 29. Saitoh Y, Suzuki H, Tani K, Nishikawa K, Irie K, Ogura Y, et al. Structural insight  
607 into tight junction disassembly by *Clostridium perfringens* enterotoxin. *Science*.  
608 2015;347(6223):775-8.
- 609 30. Bankevich A, Nurk S, Antipov D, Gurevich AA, Dvorkin M, Kulikov AS, et al.  
610 SPAdes: a new genome assembly algorithm and its applications to single-cell sequencing. *J*  
611 *Comput Biol*. 2012;19(5):455-77.
- 612 31. Page AJ, De Silva N, Hunt M, Quail MA, Parkhill J, Harris SR, et al. Robust high-  
613 throughput prokaryote de novo assembly and improvement pipeline for Illumina data. *Microb*  
614 *Genom*. 2016;2(8):e000083.
- 615 32. Boetzer M, Henkel CV, Jansen HJ, Butler D, Pirovano W. Scaffolding pre-assembled  
616 contigs using SSPACE. *Bioinformatics*. 2011;27(4):578-9.



- 617 33. Nadalin F, Vezzi F, Policriti A. GapFiller: a de novo assembly approach to fill the gap  
618 within paired reads. *BMC Bioinformatics*. 2012;13 Suppl 14:S8.
- 619 34. Seemann T. Prokka: rapid prokaryotic genome annotation. *Bioinformatics*.  
620 2014;30(14):2068-9.
- 621 35. Davis MP, van Dongen S, Abreu-Goodger C, Bartonicek N, Enright AJ. Kraken: a set  
622 of tools for quality control and analysis of high-throughput sequence data. *Methods*.  
623 2013;63(1):41-9.
- 624 36. Pritchard L, Glover RH, Humphris S, Elphinstone JG, Toth IK. Genomics and  
625 taxonomy in diagnostics for food security: soft-rotting enterobacterial plant pathogens.  
626 *Analytical Methods*. 2016;8(1):12-24.
- 627 37. Koren S, Walenz BP, Berlin K, Miller JR, Bergman NH, Phillippy AM. Canu:  
628 scalable and accurate long-read assembly via adaptive k-mer weighting and repeat separation.  
629 *Genome Res*. 2017;27(5):722-36.
- 630 38. Page AJ, Cummins CA, Hunt M, Wong VK, Reuter S, Holden MT, et al. Roary: rapid  
631 large-scale prokaryote pan genome analysis. *Bioinformatics*. 2015;31(22):3691-3.
- 632 39. Katoh K, Standley DM. MAFFT Multiple Sequence Alignment Software Version 7:  
633 Improvements in Performance and Usability. *Mol Biol Evol*. 2013;30(4):772-80.
- 634 40. Page AJ, Taylor B, Delaney AJ, Soares J, Seemann T, Keane JA, et al. SNP-sites:  
635 rapid efficient extraction of SNPs from multi-FASTA alignments. *Microb Genom*.  
636 2016;2(4):e000056.
- 637 41. Price MN, Dehal PS, Arkin AP. FastTree 2--approximately maximum-likelihood trees  
638 for large alignments. *PLoS One*. 2010;5(3):e9490.
- 639 42. Letunic I, Bork P. Interactive tree of life (iTOL) v3: an online tool for the display and  
640 annotation of phylogenetic and other trees. *Nucleic Acids Res*. 2016;44(W1):W242-5.
- 641 43. Seemann T, Klotzl F, Page AJ. snp-dists. 0.2 ed2018. p. Convert a FASTA alignment  
642 to SNP distance matrix.
- 643 44. Cheng L, Connor TR, Siren J, Aanensen DM, Corander J. Hierarchical and spatially  
644 explicit clustering of DNA sequences with BAPS software. *Mol Biol Evol*. 2013;30(5):1224-  
645 8.
- 646 45. Tonkin-Hill G, John A. L, Stephen D. B, Simon D. W. F, Jukka C. RhierBAPS: An R  
647 Implementation of the Population Clustering Algorithm hierBAPS. Wellcome Open Research.  
648 2018;3(July):93.
- 649 46. Hadfield J, Croucher NJ, Goater RJ, Abudahab K, Aanensen DM, Harris SR.  
650 Phandango: an interactive viewer for bacterial population genomics. *Bioinformatics*. 2017.
- 651 47. Jia B, Raphenya AR, Alcock B, Waglechner N, Guo P, Tsang KK, et al. CARD 2017:  
652 expansion and model-centric curation of the comprehensive antibiotic resistance database.  
653 *Nucleic Acids Res*. 2017;45(D1):D566-D73.
- 654 48. Seemann T. ABRicate. 0.5 ed2018. p. Mass screening of contigs for antimicrobial  
655 resistance or virulence genes.
- 656 49. Hunt M, Mather AE, Sanchez-Buso L, Page AJ, Parkhill J, Keane JA, et al. ARIBA:  
657 rapid antimicrobial resistance genotyping directly from sequencing reads. *Microb Genom*.  
658 2017;3(10):e000131.
- 659 50. R Development Core Team. R: A language and environment for statistical computing.  
660 Vienna, Austria2010. Available from: <http://www.R-project.org/>.
- 661 51. Warnes GR, Bolker B, Bonebakker L, Gentleman R, Huber W, Liaw A, et al. gplots:  
662 Various R Programming Tools for Plotting Data. R package version 3.0.1 ed2016.
- 663 52. Roosaare M, Puustusmaa M, Mols M, Vaher M, Remm M. PlasmidSeeker:  
664 identification of known plasmids from bacterial whole genome sequencing reads. *PeerJ*.  
665 2018;6:e4588.

- 666 53. Brynildsrud O, Bohlin J, Scheffer L, Eldholm V. Rapid scoring of genes in microbial  
667 pan-genome-wide association studies with Scoary. *Genome Biology*. 2016;17.
- 668 54. Huerta-Cepas J, Szklarczyk D, Forslund K, Cook H, Heller D, Walter MC, et al.  
669 eggNOG 4.5: a hierarchical orthology framework with improved functional annotations for  
670 eukaryotic, prokaryotic and viral sequences. *Nucleic Acids Res*. 2016;44(D1):D286-93.
- 671 55. Huerta-Cepas J, Forslund K, Pedro Coelho L, Szklarczyk D, Juhl Jensen L, von  
672 Mering C, et al. Fast genome-wide functional annotation through orthology assignment by  
673 eggNOG-mapper. *Mol Biol Evol*. 2017.
- 674 56. Arndt D, Marcu A, Liang Y, Wishart DS. PHAST, PHASTER and PHASTEST:  
675 Tools for finding prophage in bacterial genomes. *Brief Bioinform*. 2017.
- 676 57. Rutherford K, Parkhill J, Crook J, Horsnell T, Rice P, Rajandream MA, et al. Artemis:  
677 sequence visualization and annotation. *Bioinformatics*. 2000;16(10):944-5.
- 678 58. Sullivan MJ, Petty NK, Beatson SA. Easyfig: a genome comparison visualizer.  
679 *Bioinformatics*. 2011;27(7):1009-10.
- 680 59. Amar C. Fluorescent amplified fragment length polymorphism (fAFLP) analysis of  
681 *Listeria monocytogenes*. *Methods Mol Biol*. 2014;1157:95-101.
- 682 60. Lahti P, Heikinheimo A, Johansson T, Korkeala H. Clostridium perfringens type A  
683 strains carrying a plasmid-borne enterotoxin gene (Genotype IS1151-cpe or IS1470-like-cpe)  
684 as a common cause of food poisoning. *J Clin Microbiol*. 2008;46(1):371-3.
- 685 61. Li J, McClane BA. Contributions of NanI sialidase to Caco-2 cell adherence by  
686 Clostridium perfringens type A and C strains causing human intestinal disease. *Infect Immun*.  
687 2014;82(11):4620-30.
- 688 62. Theoret JR, Li J, Navarro MA, Garcia JP, Uzal FA, McClane BA. Native or  
689 Proteolytically Activated NanI Sialidase Enhances the Binding and Cytotoxic Activity of  
690 Clostridium perfringens Enterotoxin and Beta Toxin. *Infect Immun*. 2018;86(1).
- 691 63. Osman KM, Elhariri M. Antibiotic resistance of Clostridium perfringens isolates from  
692 broiler chickens in Egypt. *Rev Sci Tech*. 2013;32(3):841-50.
- 693 64. Larcombe S, Hutton ML, Lyras D. Involvement of Bacteria Other Than Clostridium  
694 difficile in Antibiotic-Associated Diarrhoea. *Trends Microbiol*. 2016;24(6):463-76.
- 695 65. Fisher DJ, Miyamoto K, Harrison B, Akimoto S, Sarker MR, McClane BA.  
696 Association of beta2 toxin production with Clostridium perfringens type A human  
697 gastrointestinal disease isolates carrying a plasmid enterotoxin gene. *Mol Microbiol*.  
698 2005;56(3):747-62.
- 699 66. Sparks SG, Carman RJ, Sarker MR, McClane BA. Genotyping of enterotoxigenic  
700 Clostridium perfringens fecal isolates associated with antibiotic-associated diarrhea and food  
701 poisoning in North America. *J Clin Microbiol*. 2001;39(3):883-8.
- 702 67. Tanaka D, Isobe J, Hosorogi S, Kimata K, Shimizu M, Katori K, et al. An outbreak of  
703 food-borne gastroenteritis caused by Clostridium perfringens carrying the cpe gene on a  
704 plasmid. *Japanese Journal of Infectious Diseases*. 2003;56(3):137-9.
- 705 68. Li J, McClane BA. Further comparison of temperature effects on growth and survival  
706 of Clostridium perfringens type A isolates carrying a chromosomal or plasmid-borne  
707 enterotoxin gene. *Appl Environ Microbiol*. 2006;72(7):4561-8.
- 708 69. Collie RE, McClane BA. Evidence that the enterotoxin gene can be episomal in  
709 Clostridium perfringens isolates associated with non-food-borne human gastrointestinal  
710 diseases. *J Clin Microbiol*. 1998;36(1):30-6.
- 711 70. Lindstrom M, Heikinheimo A, Lahti P, Korkeala H. Novel insights into the  
712 epidemiology of Clostridium perfringens type A food poisoning. *Food Microbiol*.  
713 2011;28(2):192-8.
- 714 71. Tanaka D, Kimata K, Shimizu M, Isobe J, Watahiki M, Karasawa T, et al.  
715 Genotyping of Clostridium perfringens isolates collected from food poisoning outbreaks and

- 716 healthy individuals in Japan based on the cpe locus. *Japanese Journal of Infectious Diseases*.  
717 2007;60(1):68-9.
- 718 72. Cornillot E, Saint-Joanis B, Daube G, Katayama S, Granum PE, Canard B, et al. The  
719 enterotoxin gene (cpe) of *Clostridium perfringens* can be chromosomal or plasmid-borne.  
720 *Mol Microbiol*. 1995;15(4):639-47.
- 721 73. Miyamoto K, Fisher DJ, Li J, Sayeed S, Akimoto S, McClane BA. Complete  
722 sequencing and diversity analysis of the enterotoxin-encoding plasmids in *Clostridium*  
723 *perfringens* type A non-food-borne human gastrointestinal disease isolates. *J Bacteriol*.  
724 2006;188(4):1585-98.
- 725 74. Brynestad S, Sarker MR, McClane BA, Granum PE, Rood JI. Enterotoxin plasmid  
726 from *Clostridium perfringens* is conjugative. *Infect Immun*. 2001;69(5):3483-7.
- 727 75. Miyamoto K, Li JH, McClane BA. Enterotoxigenic *Clostridium perfringens*:  
728 Detection and Identification. *Microbes Environ*. 2012;27(4):343-9.
- 729 76. Gera K, Le T, Jamin R, Eichenbaum Z, McIver KS. The phosphoenolpyruvate  
730 phosphotransferase system in group A *Streptococcus* acts to reduce streptolysin S activity and  
731 lesion severity during soft tissue infection. *Infect Immun*. 2014;82(3):1192-204.
- 732 77. Mertins S, Joseph B, Goetz M, Ecke R, Seidel G, Sprehe M, et al. Interference of  
733 components of the phosphoenolpyruvate phosphotransferase system with the central  
734 virulence gene regulator PrfA of *Listeria monocytogenes*. *J Bacteriol*. 2007;189(2):473-90.
- 735 78. Genevaux P, Wawrzynow A, Zylicz M, Georgopoulos C, Kelley WL. DjlA is a third  
736 DnaK co-chaperone of *Escherichia coli*, and DjlA-mediated induction of colanic acid capsule  
737 requires DjlA-DnaK interaction. *J Biol Chem*. 2001;276(11):7906-12.
- 738 79. Barocchi MA, Ries J, Zogaj X, Hemsley C, Albiger B, Kanth A, et al. A  
739 pneumococcal pilus influences virulence and host inflammatory responses. *Proc Natl Acad*  
740 *Sci U S A*. 2006;103(8):2857-62.
- 741 80. Arita-Morioka K, Yamanaka K, Mizunoe Y, Ogura T, Sugimoto S. Novel strategy for  
742 biofilm inhibition by using small molecules targeting molecular chaperone DnaK.  
743 *Antimicrob Agents Chemother*. 2015;59(1):633-41.
- 744 81. Boyd EF. Bacteriophage-encoded bacterial virulence factors and phage-pathogenicity  
745 island interactions. *Adv Virus Res*. 2012;82:91-118.
- 746 82. Kinney DM, Bramucci MG. Analysis of *Bacillus subtilis* sporulation with spore-  
747 converting bacteriophage PMB12. *J Bacteriol*. 1981;145(3):1281-5.
- 748 83. Fortier LC, Sekulovic O. Importance of prophages to evolution and virulence of  
749 bacterial pathogens. *Virulence*. 2013;4(5):354-65.
- 750 84. Shimizu T, Ohtani K, Hirakawa H, Ohshima K, Yamashita A, Shiba T, et al.  
751 Complete genome sequence of *Clostridium perfringens*, an anaerobic flesh-eater. *Proc Natl*  
752 *Acad Sci U S A*. 2002;99(2):996-1001.
- 753 85. Andersen JL, He GX, Kakarla P, K CR, Kumar S, Lakra WS, et al. Multidrug efflux  
754 pumps from *Enterobacteriaceae*, *Vibrio cholerae* and *Staphylococcus aureus* bacterial food  
755 pathogens. *Int J Environ Res Public Health*. 2015;12(2):1487-547.
- 756 86. Govind R, Dupuy B. Secretion of *Clostridium difficile* toxins A and B requires the  
757 holin-like protein TcdE. *PLoS Pathog*. 2012;8(6):e1002727.
- 758 87. Lakshminarayanan B, Harris HM, Coakley M, O'Sullivan O, Stanton C, Pruteanu M,  
759 et al. Prevalence and characterization of *Clostridium perfringens* from the faecal microbiota  
760 of elderly Irish subjects. *J Med Microbiol*. 2013;62(Pt 3):457-66.
- 761 88. Hu WS, Kim H, Koo OK. Molecular genotyping, biofilm formation and antibiotic  
762 resistance of enterotoxigenic *Clostridium perfringens* isolated from meat supplied to school  
763 cafeterias in South Korea. *Anaerobe*. 2018;52:115-21.

- 764 89. Heikinheimo A, Lindstrom M, Granum PE, Korkeala H. Humans as reservoir for  
765 enterotoxin gene--carrying *Clostridium perfringens* type A. *Emerg Infect Dis*.  
766 2006;12(11):1724-9.
- 767 90. Miyamoto K, Yumine N, Mimura K, Nagahama M, Li J, McClane BA, et al.  
768 Identification of novel *Clostridium perfringens* type E strains that carry an iota toxin plasmid  
769 with a functional enterotoxin gene. *PLoS One*. 2011;6(5):e20376.
- 770 91. Li J, McClane BA. A novel small acid soluble protein variant is important for spore  
771 resistance of most *Clostridium perfringens* food poisoning isolates. *PLoS Pathog*.  
772 2008;4(5):e1000056.
- 773 92. Ashton PM, Nair S, Peters TM, Bale JA, Powell DG, Painset A, et al. Identification of  
774 *Salmonella* for public health surveillance using whole genome sequencing. *PeerJ*.  
775 2016;4:e1752.
- 776 93. Schmid D, Allerberger F, Huhulescu S, Pietzka A, Amar C, Kleta S, et al. Whole  
777 genome sequencing as a tool to investigate a cluster of seven cases of listeriosis in Austria  
778 and Germany, 2011-2013. *Clin Microbiol Infect*. 2014;20(5):431-6.
- 779 94. Deguchi A, Miyamoto K, Kuwahara T, Miki Y, Kaneko I, Li J, et al. Genetic  
780 characterization of type A enterotoxigenic *Clostridium perfringens* strains. *PLoS One*.  
781 2009;4(5):e5598.
- 782 95. Claesson MJ, Jeffery IB, Conde S, Power SE, O'Connor EM, Cusack S, et al. Gut  
783 microbiota composition correlates with diet and health in the elderly. *Nature*.  
784 2012;488(7410):178-84.
- 785 96. Keto-Timonen R, Heikinheimo A, Eerola E, Korkeala H. Identification of *Clostridium*  
786 species and DNA fingerprinting of *Clostridium perfringens* by amplified fragment length  
787 polymorphism analysis. *J Clin Microbiol*. 2006;44(11):4057-65.
- 788 97. Gardy J, Loman NJ, Rambaut A. Real-time digital pathogen surveillance - the time is  
789 now. *Genome Biol*. 2015;16(1):155.
- 790 98. Quick J, Ashton P, Calus S, Chatt C, Gossain S, Hawker J, et al. Rapid draft  
791 sequencing and real-time nanopore sequencing in a hospital outbreak of *Salmonella*. *Genome*  
792 *Biol*. 2015;16:114.

793

794

795 **Figure legends**

796 **Fig. 1 Population structure and sample distribution statistics for genome assemblies**

797 **(A)** Population structure of 109 *C. perfringens* isolates analysed in this study. Mid-point  
798 rooted maximum-likelihood phylogeny inferred from 73 882 SNPs identified in 110  
799 diarrhoea-associated *C. perfringens* isolates (including NCTC8239). The colour-coded rings  
800 indicated cohort-specific origins of isolates. Cluster VIII (green ring; clusters determined via  
801 hierBAPS clustering analysis) consists of primarily isolates obtained from multiple care  
802 home-associated outbreaks. Historical food poisoning isolate NCTC8239 was used as a  
803 public reference genome as indicated in the figure. Bootstrap values are represented in the  
804 tree. Branch lengths are indicative of the estimated nucleotide substitution per site (SNPs).  
805 **(B)** Temporal distribution of all 109 *C. perfringens* genomes included in this study. **(C)**  
806 Contig count distribution of *C. perfringens* genome assemblies in this study. More than 70%  
807 of the total assemblies are <200 contigs.

808

809 **Fig. 2 Phylogenomic analysis of care home-associated *C. perfringens* isolates**

810 **(A)** Mid-point rooted maximum-likelihood phylogeny inferred from 64 560 SNPs (in core  
811 gene alignment) identified in 35 care home-associated *C. perfringens* isolates. The colour  
812 strips indicate diarrhoea outbreaks, location of outbreaks and fAFLP types respectively  
813 corresponding to the isolates. Branch lengths are indicative of the estimated SNP distance.  
814 Lineages and sub-lineages were determined via hierBAPS (level 1 & 2) clustering analysis.  
815 NCTC8239, a food poisoning isolate, was used as a public reference genome in this tree.  
816 Bootstrapping values are represented on the tree. **(B)** Unrooted maximum-likelihood tree  
817 (inferred from 191 SNPs in 18 genomes) of a sub-lineage IVc (excluding three genetically  
818 distant Welsh isolates) showing SNP distances in between 18 North-East England-derived

819 isolates of individual outbreaks (labeled in locations and years, and SNP range in outbreaks;  
820 branches are colour-coded corresponding to individual outbreaks). SNP distances between  
821 branches are indicated in red numbers. **(C)** Pairwise within-outbreak core-SNP distance  
822 between isolates. **(D)** Pairwise outside-sub-lineage (IVb vs IVc) SNP comparison between  
823 isolates. Data: Mann-Whitney test. \*\*\*\* P<0.0001.

824

825 **Fig. 3 Phylogenomic analysis of 75 foodborne-associated *C. perfringens* isolates**

826 **(A)** Mid-point rooted maximum-likelihood phylogeny of food-poisoning *C. perfringens*  
827 inferred from 70 613 SNPs (in core gene alignment) identified in 75 individual isolates.  
828 NCTC8239, a food poisoning strain isolated in 1949 (encodes *cpe* gene) is a RefSeq public  
829 reference genome. Lineages were determined via hierBAPS clustering analysis. Bootstrap  
830 values are represented in the tree. **(B)** Unrooted maximum-likelihood tree inferred from 2 505  
831 SNPs in lineage VII (31 isolates). Four distinct clusters are identified in different outbreaks  
832 comprising genetically-similar strains (labeled in locations and years, and SNP range in  
833 outbreaks; branches are colour-coded corresponding to outbreak labels). **(C)** Pairwise core-  
834 SNP distance comparison in between isolates within outbreaks. **(D)** Pairwise core-SNP  
835 comparisons of within-major-lineage isolates in between individual outbreaks. Lineage I:  
836 outbreaks 1,4,13 and 14; Lineage IV: outbreaks 3 and 7; Lineage VII: outbreaks 2, 7 and 10.  
837 Data: Kruskal-Wallis test; \*\*\*\* P<0.0001.

838

839 **Fig. 4 Full virulence profiles of *C. perfringens* isolates including virulence plasmids**

840 Binary heatmaps displaying presence and absence of toxin genes, AMR genes, plasmids,  
841 plasmid-related sequences and *tcp* conjugative loci in corresponding isolates: **(A)** CH isolates  
842 **(B)** FP isolates. Outbreaks were colour-coded according to the colour system in previous

843 figures. Coloured cells represent presence of genes and white cells represent absence of  
844 genes. Heatmaps were generated in R.

845

846 **Fig. 5 Investigations on predicted plasmids carried by CH and FP isolates**

847 **(A)** Comparative genomic visualisation of reference plasmids pCPF4969 and pCPF5603 with  
848 annotated features. **(B)** Genomic comparison of pCPF5603 reference plasmid and predicted  
849 plasmids from CH genomes. **(C)** Plasmid comparison in between pCPF4969 plasmid and FP-  
850 isolate predicted plasmids. **(D)** CPE-regions (Tn5565) extracted computationally from FP  
851 lineage I representative isolate genomes. **(E)** A computationally extracted 11-kbp region of  
852 NCTC8239 that encodes Tn5565 (including cpe and flanking IS1470 elements) compared to  
853 predicted Tn5565 from PH004. Figures were produced using Easyfig v2.2.2.

854

A

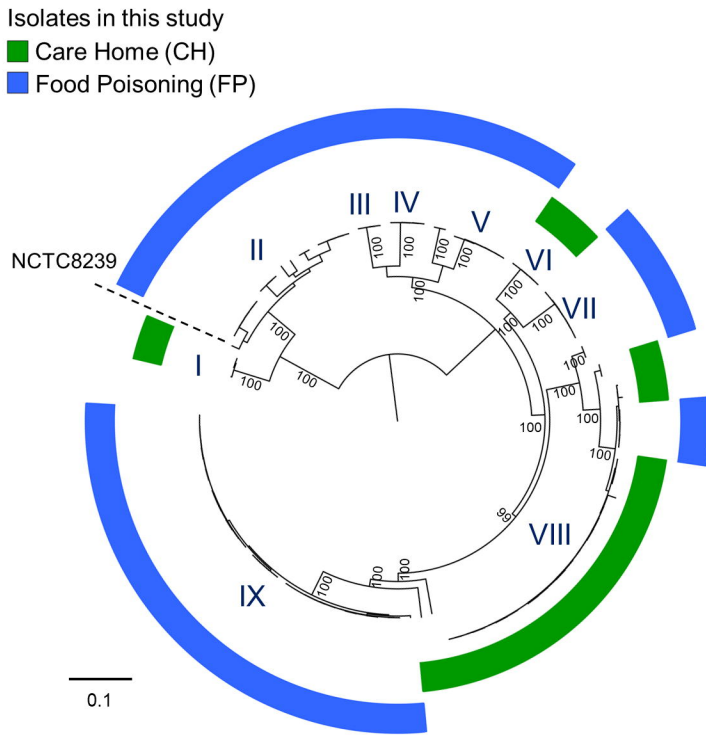

B

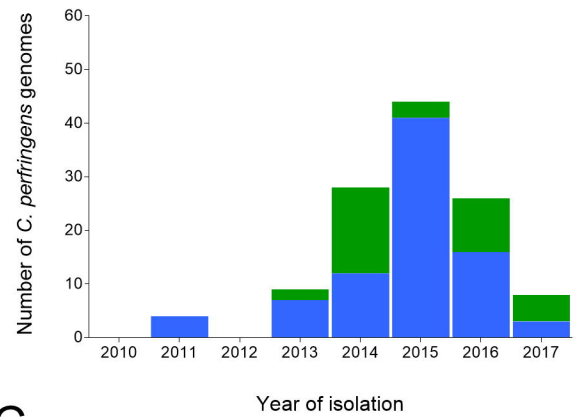

C

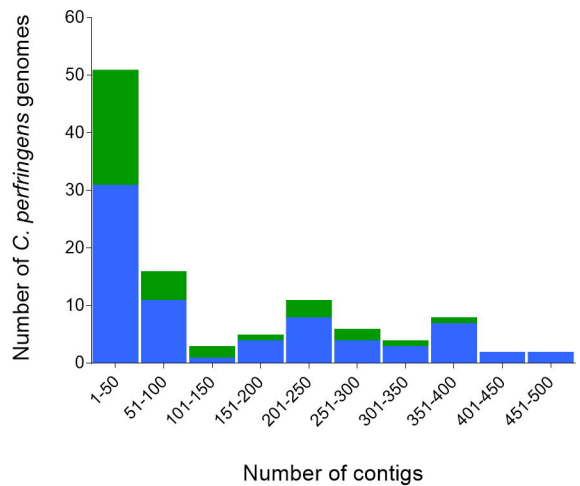

**Fig. 1 Population structure and sample distribution statistics for genome assemblies**

(A) Population structure of 109 *C. perfringens* isolates analysed in this study. Mid-point rooted maximum-likelihood phylogeny inferred from 73 882 SNPs identified in 110 diarrhoea-associated *C. perfringens* isolates (including NCTC8239). The colour-coded rings indicated cohort-specific origins of isolates. Cluster VIII (green ring; clusters determined via hierBAPS clustering analysis) consists of primarily isolates obtained from multiple care home-associated outbreaks. Historical food poisoning isolate NCTC8239 was used as a public reference genome as indicated in the figure. Bootstrap values are represented in the tree. Branch lengths are indicative of the estimated nucleotide substitution per site (SNPs). (B) Temporal distribution of all 109 *C. perfringens* genomes included in this study. (C) Contig count distribution of *C. perfringens* genome assemblies in this study. More than 70% of the total assemblies are <200 contigs.



A

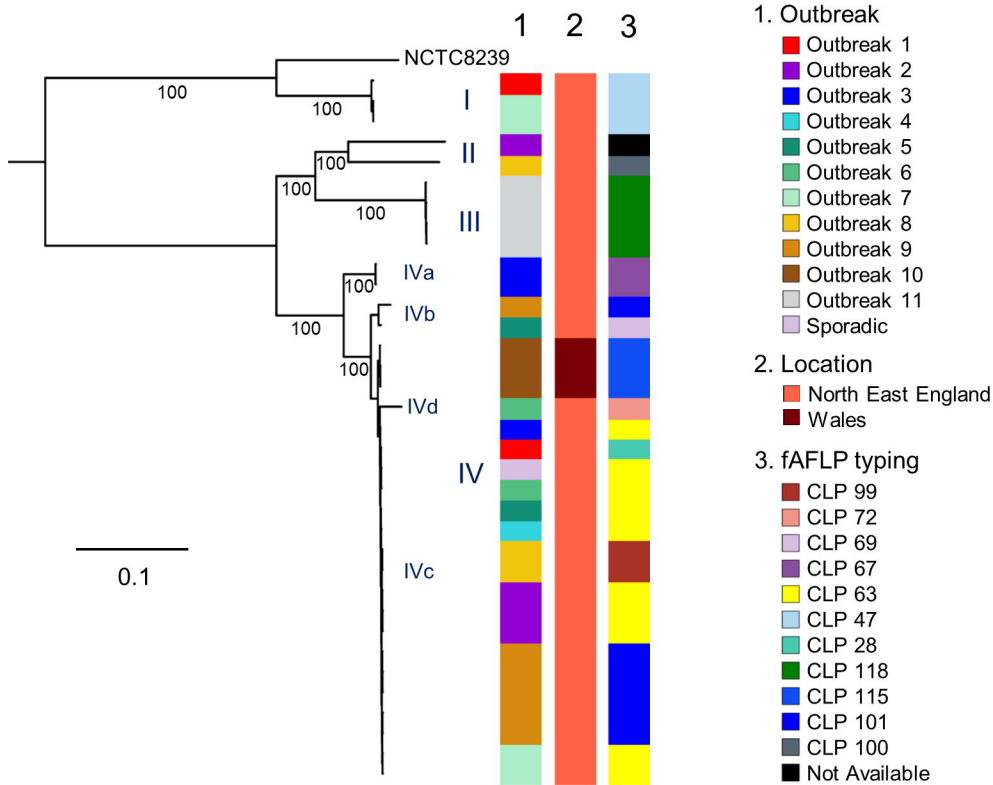

B

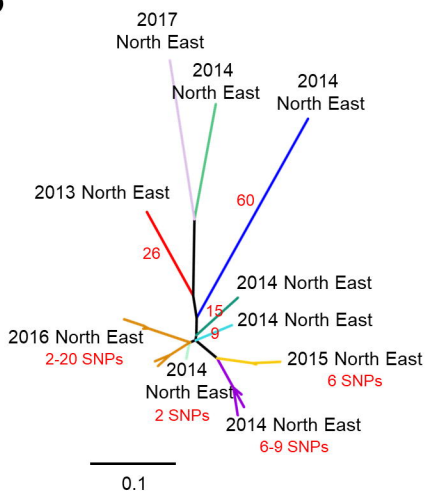

C

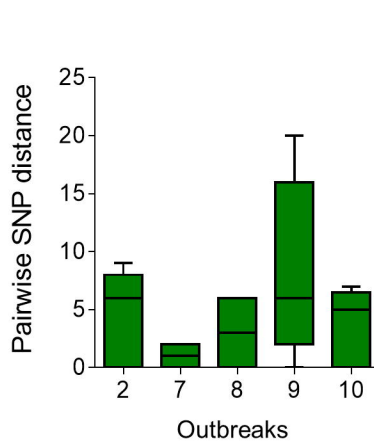

D

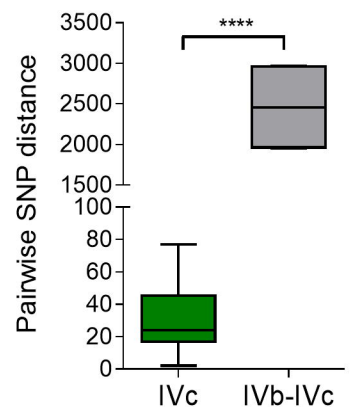

**Fig. 2 Phylogenomic analysis of care home-associated *C. perfringens* isolates**

(A) Mid-point rooted maximum-likelihood phylogeny inferred from 64 560 SNPs (in core gene alignment) identified in 35 care home-associated *C. perfringens* isolates. The colour strips indicate diarrhoea outbreaks, location of outbreaks and fAFLP types respectively corresponding to the isolates. Branch lengths are indicative of the estimated SNP distance. Lineages and sub-lineages were determined via hierBAPS (level 1 & 2) clustering analysis. NCTC8239, a food poisoning isolate, was used as a public reference genome in this tree. Bootstrapping values are represented on the tree. (B) Unrooted maximum-likelihood tree (inferred from 191 SNPs in 18 genomes) of a sub-lineage IVc showing SNP distances in between 18 North-East England-derived isolates of individual outbreaks (labeled in locations and years, and SNP range in outbreaks; branches are colour-coded corresponding to individual outbreaks). SNP distances between branches are indicated in red numbers. (C) Pairwise within-outbreak core-SNP distance between isolates. (D) Pairwise outside-sub-lineage (IVb vs IVc) SNP comparison between isolates. Data: Mann-Whitney test. \*\*\*\* P<0.0001.

A

1. Outbreak

- Outbreak 1
- Outbreak 2
- Outbreak 3
- Outbreak 4
- Outbreak 5
- Outbreak 6
- Outbreak 7
- Outbreak 8
- Outbreak 9
- Outbreak 10
- Outbreak 11
- Outbreak 12
- Outbreak 13
- Outbreak 14
- Sporadic

2. Location

- London
- North East England
- North West England
- South East England
- South West England
- West Midlands

3. Source

- Human Clinical Isolate
- Food Source Isolate

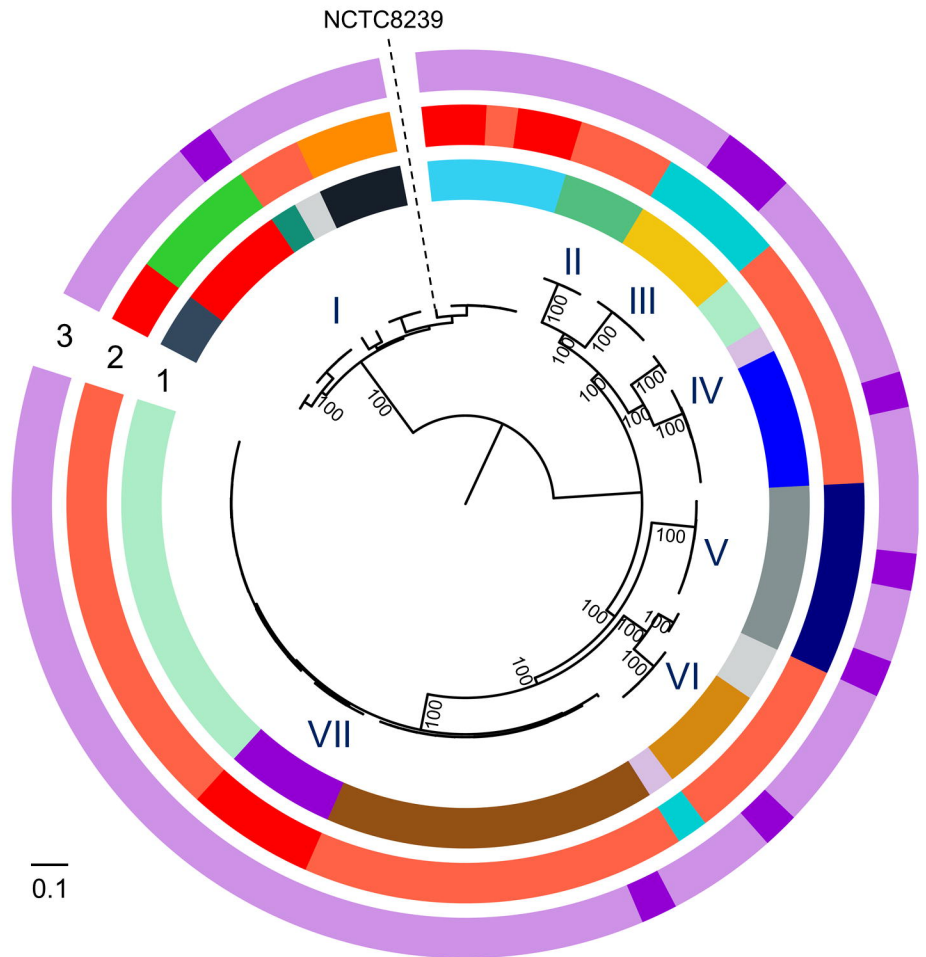

B

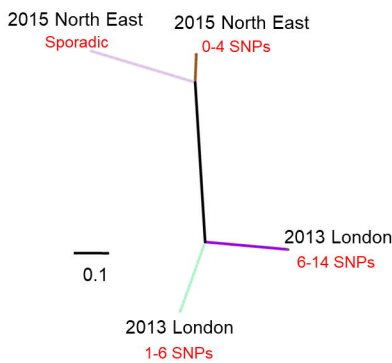

C

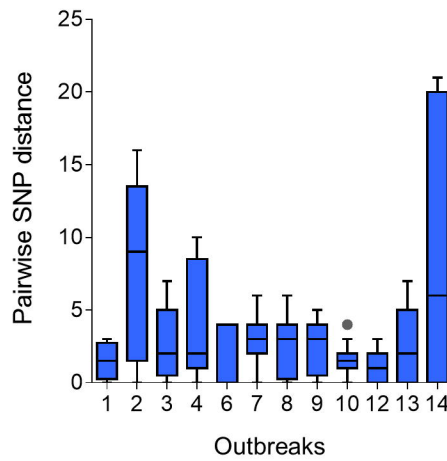

D

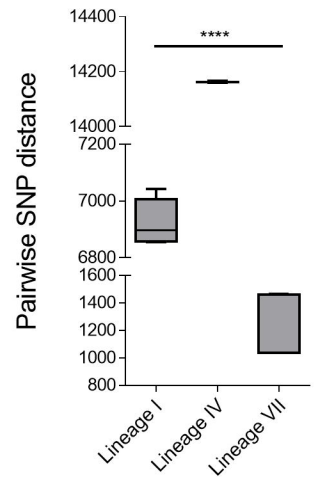

**Fig. 3 Phylogenomic analysis of 75 foodborne-associated *C. perfringens* isolates**

(A) Mid-point rooted maximum-likelihood phylogeny of food-poisoning *C. perfringens* inferred from 70 613 SNPs (in core gene alignment) identified in 75 individual isolates. NCTC8239, a food poisoning strain isolated in 1949 (encodes *cpe* gene) is a RefSeq public reference genome. Lineages were determined via hierBAPS clustering analysis. Bootstrap values are represented in the tree. (B) Unrooted maximum-likelihood tree inferred from 2 505 SNPs in lineage VII (31 isolates). Four distinct clusters are identified in different outbreaks comprising genetically-similar strains (labeled in locations and years, and SNP range in outbreaks; branches are colour-coded corresponding to outbreak labels). (C) Pairwise core-SNP distance comparison in between isolates within outbreaks. (D) Pairwise core-SNP comparisons of within-major-lineage isolates in between individual outbreaks. Lineage I: outbreaks 1,4,13 and 14; Lineage IV: outbreaks 3 and 7; Lineage VII: outbreaks 2, 7 and 10. Data: Kruskal-Wallis test; \*\*\*\* P<0.0001.

**A**

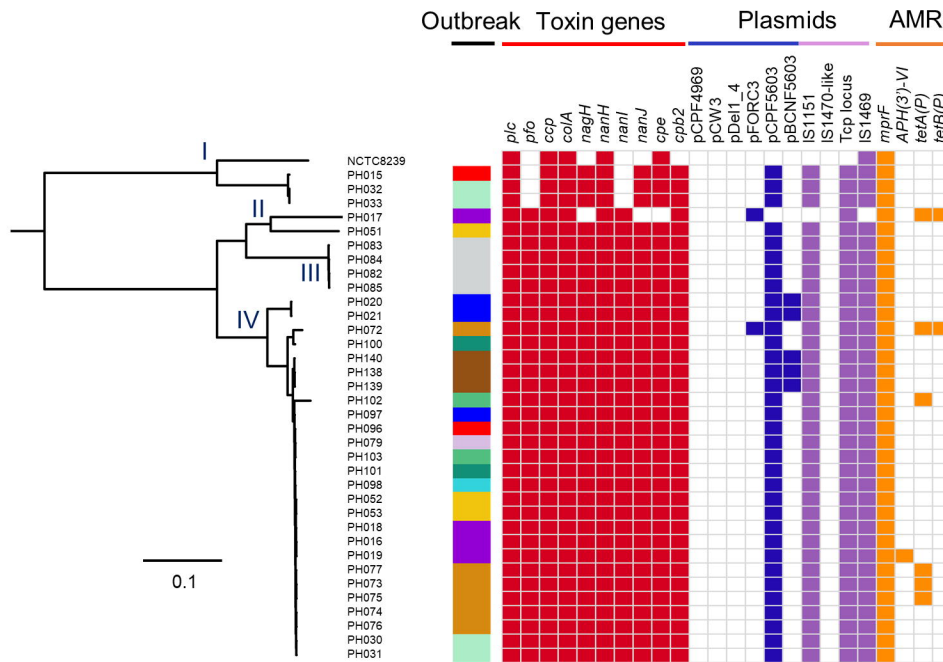

**B**

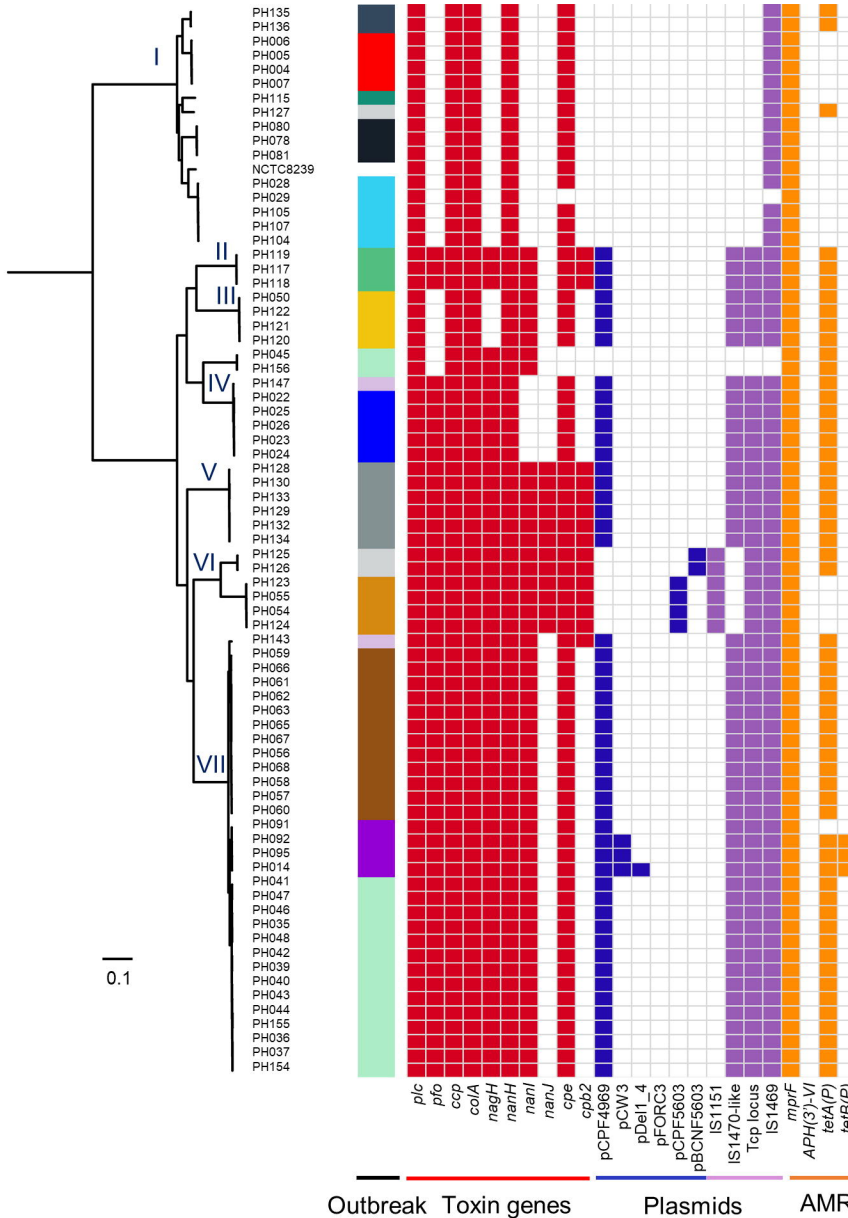

**Fig. 5 Full virulence profiles of *C. perfringens* isolates including virulence plasmids**

Binary heatmaps displaying presence and absence of toxin genes, AMR genes, plasmids, plasmid-related sequences and *tcp* conjugative loci in corresponding isolates: **(A)** CH isolates **(B)** FP isolates. Outbreaks were colour-coded according to the colour system in previous figures. Coloured cells represent presence of genes and white cells represent absence of genes. Heatmaps were generated in R.

A

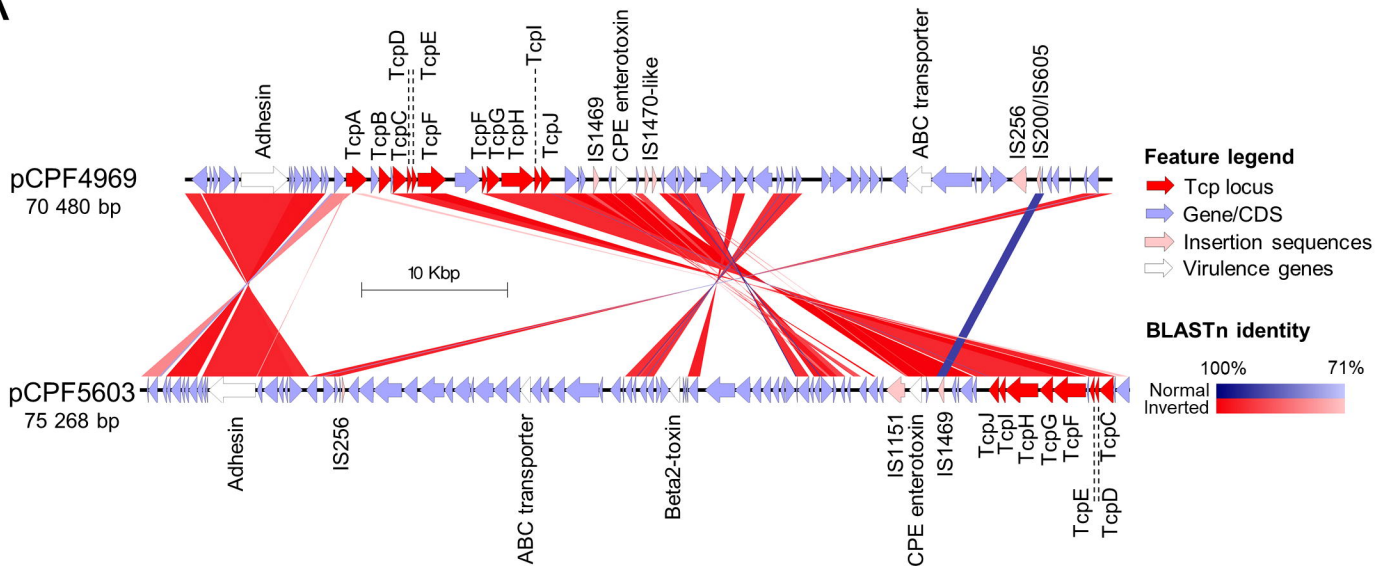

B

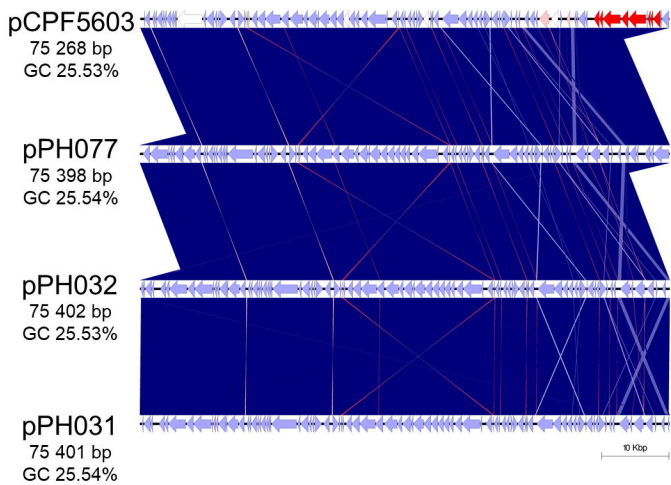

C

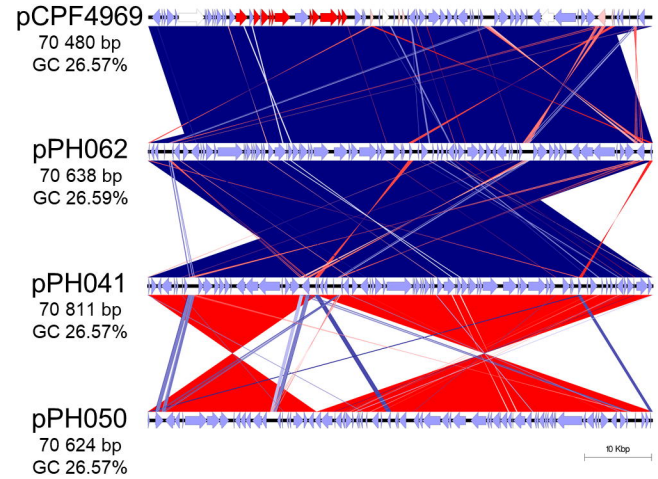

D

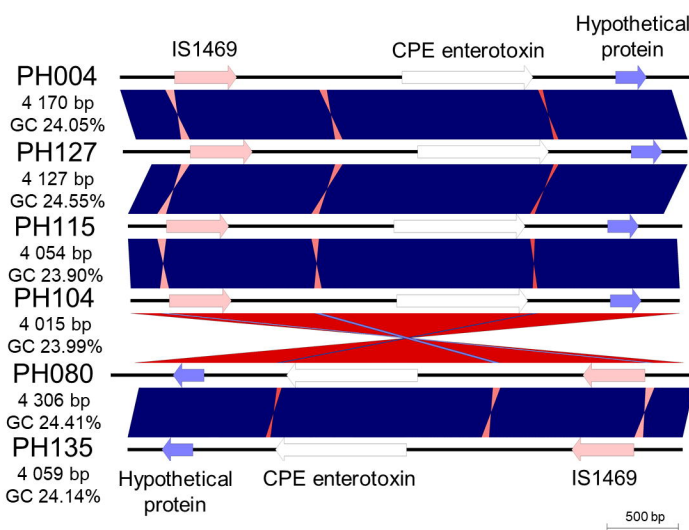

E

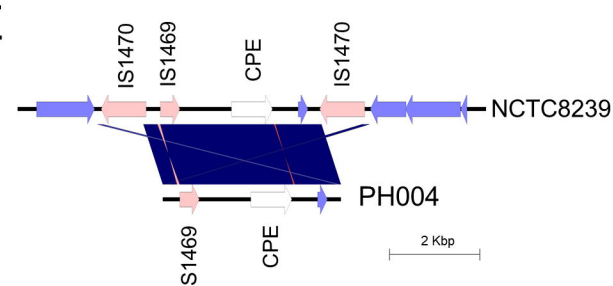

**Fig. 5 Investigations on predicted plasmids carried by CH and FP isolates**

(A) Comparative genomic visualisation of reference plasmids pCPF4969 and pCPF5603 with annotated features. (B) Genomic comparison of pCPF5603 reference plasmid and predicted plasmids from CH genomes. (C) Plasmid comparison in between pCPF4969 plasmid and FP-isolate predicted plasmids. (D) CPE-regions (Tn5565) extracted computationally from FP lineage I representative isolate genomes. (E) A computationally extracted 11-kbp region of NCTC8239 that encodes *Tn5565* (including *cpe* and flanking IS1470 elements) compared to predicted Tn5565 from PH004. Figures were produced using Easyfig v2.2.2.
